# Supplementary material for: The RecU Holliday junction resolvase acts at early stages of homologous recombination
Source: PubMed Central journal article supplement — Nucleic Acids Res. 2008 Aug 6;36(16):5242–9. doi: 10.1093/nar/gkn500 (PMC2532717; doi:10.1093/nar/gkn500), 2008-08-06
Supplement: gkn500_1.pdf [file gkn500_1.pdf]

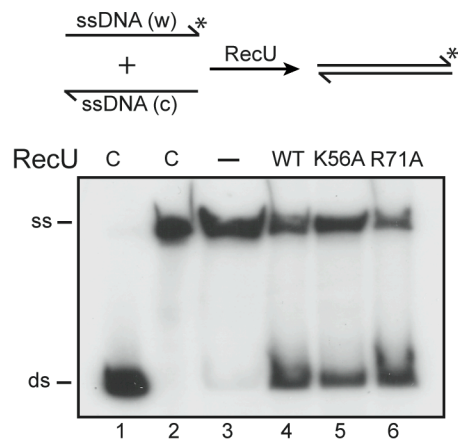

**Supplementary Figure 1. RecUK56A or RecUR71A anneals ssDNA.** Heat denatured DNA (0.3  $\mu\text{M}$  in nt) renders complementary Watson (w) and Crick (c) strands and addition of RecU enhances the annealing reaction (upper drawing). Heat denatured DNA was incubated with RecU, RecUK56A or RecUR71A (200 nM) in buffer A containing 1 mM  $\text{MgCl}_2$  for 15 min. After deproteinization, substrates and products were separated by 6% dPAGE. C, control dsDNA (ds) and ssDNA (ss); -, denotes no protein addition.
