# Supplementary material for: The RecU Holliday junction resolvase acts at early stages of homologous recombination
Source: PubMed Central journal article supplement — Nucleic Acids Res. 2008 Aug 6;36(16):5242–9. doi: 10.1093/nar/gkn500 (PMC2532717; doi:10.1093/nar/gkn500), 2008-08-06
Supplement: gkn500_2.pdf [file gkn500_2.pdf]

**Supplementary Table 1.** Bacterial strains used in this study

| Bacterial strain <sup>i</sup> | Relevant genotype                                                     | Source or reference |
|-------------------------------|-----------------------------------------------------------------------|---------------------|
| BG214                         | <i>trpC2 metB5 amyE sigB37 xin-1 attSP<math>\beta</math> attICEBs</i> | Strain collection   |
| BG703                         | + $\Delta$ <i>ruvAB</i>                                               | (1)                 |
| BG190                         | + $\Delta$ <i>recA</i>                                                | (2)                 |
| BG855 <sup>b</sup>            | + $\Delta$ <i>recU</i>                                                | This work           |
| BG651 <sup>b</sup>            | + $\Delta$ <i>recA</i> $\Delta$ <i>recU</i>                           | This work           |
| BG1019                        | + <i>recU56</i>                                                       | This work           |
| BG1021                        | + <i>recU71</i>                                                       | This work           |
| BG1023                        | + $\Delta$ <i>recA</i> <i>recU56</i>                                  | This work           |
| BG1025                        | + $\Delta$ <i>recA</i> <i>recU71</i>                                  | This work           |

<sup>a</sup>All strains are isogenic with BG214. <sup>b</sup>The entire *recU* gene coding region was deleted.

1. Sanchez H, *et al.* (2005) The RuvAB branch migration translocase and RecU Holliday junction resolvase are required for double-stranded DNA break repair in *Bacillus subtilis*. *Genetics* 171: 873-883.
2. Ceglowski P, Luder G, Alonso JC (1990) Genetic analysis of *recE* activities in *Bacillus subtilis*. *Mol Gen Genet* 222: 441-445.
